# Supplementary material for: Variation in zoo diets, offerings of leafy browse, and body condition scores in Matschie’s tree kangaroos (Dendrolagus matschiei) and their associations with gut microbiome composition
Source: PeerJ. 2026 Feb 19;14:e20875. doi: 10.7717/peerj.20875 (PMC12925411; doi:10.7717/peerj.20875)
Supplement: Supplemental Information 4 [file peerj-14-20875-s004.xlsx]

## Sheet: Koester et al_Diet and Animal C
Date_Sample_Collected	Species	Individual	SB_Number	Code	Browse_Category	BCS_category	DM_g_Consumed	CP_g	ADF_g	NDF_g	TNC_g	Starch_g	ESC_g	CF_g	CP_per	ADF_per	NDF_per	TNC_per	Starch_per	ESC_per	CF_per
2021-09-14	Matschies	Bexley	514	LCZ514a	Low	Over-Conditioned	126.7	26.2	21.5	30.6	54.7	24.4	16.7	6.1	20.7	17	24.1	43.2	19.2	13.2	4.8
2021-09-15	Matschies	Som	548	LCZ548a	Low	NA	121.3	24.7	20.4	29.7	52.6	23.5	16.5	6	20.4	16.8	24.5	43.3	19.3	13.6	5
2021-09-14	Matschies	Milla	403	LCZ403a	Low	Ideal	100	18	16.1	22.6	47.4	22	16.4	4.9	18	16.1	22.6	47.4	22	16.4	4.9
2021-10-19	Matschies	AJ	406	DZ406a	Low	Over-Conditioned	147	32.7	28	38.3	57.9	21.1	17.5	8.8	22.2	19.1	26	39.4	14.3	11.9	6
2021-09-14	Matschies	Tia	512	RBZ512a	None	Ideal	96.9	22	18.5	24.9	38.8	14.4	10.5	4.4	22.7	19.1	25.7	40.1	14.9	10.9	4.6
2022-08-01	Matschies	Adelaide	539	SFCTZ539B	Intermediate	Ideal	94	22.7	15.9	22.3	37.8	17.3	8.3	5.1	24.2	16.9	23.7	40.2	18.4	8.9	5.5
2022-08-06	Matschies	Luka	547	CZ547B	Low	Ideal	117.7	24.6	23	32.7	43	12.5	14	7.4	20.9	19.5	27.8	36.5	10.6	11.9	6.3
2022-04-09	Matschies	Tristan	497	CM497A10D1	None	Over-Conditioned	171.7	37.2	28.5	42	72.9	29.9	23.2	8.8	21.6	16.6	24.4	42.4	17.4	13.5	5.1
2022-02-23	Matschies	Tia	512	CMZ512A	High	Ideal	91.8	18.1	14.9	20.8	42.2	18.4	14	4.5	19.8	16.2	22.7	45.9	20	15.3	4.9
2022-02-23	Matschies	Kiari	489	CMZ489A	High	Ideal	108.1	23.2	18	24.7	47.4	19.3	15.3	5.5	21.5	16.6	22.8	43.9	17.9	14.2	5.1
2022-02-23	Matschies	Sausi	503	CMZ503A	High	Ideal	76.6	18.4	14.6	19.1	30	10.5	8.4	3.7	24	19.1	24.9	39.2	13.7	11	4.9
2022-03-05	Matschies	Polly	529	BZ529A	Low	Ideal	165	31.6	25.1	39.9	73.9	31.8	21.5	7.9	19.2	15.2	24.1	44.8	19.3	13	4.8
2022-02-16	Matschies	Bek	538	SDZ538A	Intermediate	Ideal	159.5	29.9	24.4	39.6	70.6	30.3	18.2	7.5	18.7	15.3	24.8	44.3	19	11.4	4.7
2022-02-13	Matschies	Roger_Paul	493	DWA493A	Intermediate	Ideal	198.6	37.5	35	54.8	79.5	32.6	20.9	9.7	18.9	17.6	27.6	40	16.4	10.5	4.9
2022-02-26	Matschies	Cori	531	CZ531A	Low	Ideal	181.8	37.2	36.5	53	65.2	16.4	19.5	11.3	20.5	20.1	29.2	35.8	9	10.7	6.2
2022-02-13	Matschies	Lenah	525	DWA525A	Intermediate	Over-Conditioned	220.8	41.7	39	59.5	87.8	36.1	24.5	12	18.9	17.7	27	39.8	16.3	11.1	5.4
2022-02-25	Matschies	Luka	547	CZ547A	Low	Ideal	93.8	21.1	17.2	23.4	36.2	12.9	12	5.6	22.5	18.3	24.9	38.6	13.8	12.8	6
2022-02-22	Matschies	Judie	526	LCZ526B	Low	Ideal	101.1	20.4	16.1	24.3	44.9	20.5	13.8	5.2	20.2	15.9	24	44.4	20.3	13.7	5.1
2022-03-03	Matschies	LaRoo	477	RWZ477A	Low	Ideal	134.9	27.8	21.1	29.9	61.7	24.3	20.6	6.7	20.6	15.6	22.2	45.8	18	15.3	5
2022-03-03	Matschies	Keweng	549	RWZ549A	Low	NA	94.2	21.4	15.5	21.7	39.3	15.9	11.6	5	22.7	16.5	23.1	41.7	16.9	12.3	5.3
2022-03-03	Matschies	Morobe	491	RWZ491A	Low	Over-Conditioned	149.8	30.2	26.4	36.2	65.7	24.4	22.3	6.9	20.2	17.6	24.2	43.9	16.3	14.9	4.6
2022-02-22	Matschies	Milla	403	LCZ403B	None	Ideal	93.9	16.6	14.5	20.6	45.5	20.7	16.7	4.3	17.6	15.5	22	48.5	22	17.8	4.6
2022-03-12	Matschies	Kasbeth	417	SLZ417A	Low	NA	107	23.4	19.3	26.5	44.2	17	14.1	5.2	21.9	18.1	24.8	41.3	15.9	13.2	4.9
2022-08-01	Matschies	Ecki	540	SFCTZ540B	Intermediate	Over-Conditioned	90.2	21.8	15.5	21.4	36.3	16.1	8.1	4.7	24.2	17.2	23.7	40.2	17.9	9	5.2
2022-03-18	Matschies	Gru	515	KCZ515A	Intermediate	Ideal	99.8	21	17.3	24.3	43.3	16.3	14.7	4.8	21	17.3	24.3	43.4	16.4	14.7	4.8
2022-02-22	Matschies	Som	548	LCZ548B	Intermediate	NA	71.5	12.9	11.3	18.5	31.6	13.3	8.5	3.4	18	15.8	25.9	44.2	18.7	11.9	4.8
2022-02-22	Matschies	Bexley	514	LCZ514B	None	Over-Conditioned	152.7	31.6	25.6	36.6	66.3	29.8	20.3	7.4	20.7	16.8	24	43.4	19.5	13.3	4.9
2022-02-16	Matschies	Arona	543	SDZ543A	Intermediate	Over-Conditioned	173.5	33.3	28.1	45	74.8	30.1	17	7.8	19.2	16.2	25.9	43.1	17.4	9.8	4.5
2022-03-03	Matschies	Adoni	535	BMZ535A	Low	Ideal	166.1	39.5	30.3	41.2	65.4	22.2	20.5	8.4	23.8	18.3	24.8	39.4	13.3	12.3	5
2022-03-27	Matschies	Elanna	496	WPZ496B	High	Ideal	43.1	8.8	6	9	19.6	8.4	8.1	2.5	20.4	13.9	20.8	45.3	19.4	18.7	5.8
2022-01-29	Matschies	Banyon	498	ZM498A	Intermediate	Ideal	213.3	39.4	43.6	62.5	81.8	24.3	27.2	11.6	18.5	20.4	29.3	38.4	11.4	12.7	5.4
2022-07-22	Matschies	Roger_Paul	493	DWA493B	Intermediate	Ideal	81.9	13.5	11	17.8	40.2	18.4	16.7	4.3	16.5	13.4	21.7	49.1	22.5	20.4	5.2
2022-08-06	Matschies	Cori	531	CZ531B	Low	Ideal	147.1	30.1	29.4	42.7	53.1	13.7	16	9.1	20.5	20	29	36.1	9.3	10.9	6.2
2022-04-25	Matschies	Adelaide	539	SFCTZ53910D1	Intermediate	Ideal	143.3	35.6	25.1	34.6	55.9	24.2	11.7	7.5	24.8	17.5	24.1	39	16.9	8.1	5.2
2022-04-25	Matschies	Ecki	540	SFCTZ54010D1	Intermediate	Over-Conditioned	144.9	35.6	25.1	34.6	57.1	24.8	12.6	7.6	24.6	17.3	23.9	39.4	17.1	8.7	5.3
2022-07-23	Matschies	Lenah	525	DWA525B	Intermediate	Over-Conditioned	106.7	20.7	16.4	25.6	46	20.8	14.5	5.8	19.4	15.3	24	43.1	19.5	13.6	5.4
2022-02-17	Matschies	AJ	406	DZ406B	Low	Over-Conditioned	121.6	27.5	22.3	30.3	48.5	19.6	14	7.6	22.6	18.3	24.9	39.9	16.1	11.5	6.3
2022-03-06	Matschies	Artemis	478	BZ478A	Low	Over-Conditioned	190.7	33.3	30.7	37.6	95	33.3	26.3	9.1	17.4	16.1	19.7	49.8	17.5	13.8	4.8
2022-07-22	Matschies	Tia	512	CMZ512B	High	Ideal	44.1	9.1	7.9	11.7	17.4	4.5	7	2.6	20.6	17.9	26.5	39.5	10.3	15.9	5.8
2022-07-22	Matschies	Kiari	489	CMZ489B	High	Ideal	97.6	18.3	18	27.9	38	11.2	11.6	5.9	18.8	18.5	28.6	39	11.5	11.9	6
2022-07-22	Matschies	Sausi	503	CMZ503B	High	Ideal	23.2	4.3	3.7	5.5	10.1	2.5	4.6	1.3	18.7	16.2	23.7	43.6	11	19.8	5.7
2022-03-27	Matschies	Rocket	521	WPZ521B	High	Ideal	82.6	16.1	12.6	19.5	37.2	13.6	13.7	4.6	19.5	15.2	23.6	45	16.4	16.6	5.6
2022-07-31	Matschies	Arona	543	SDZ543B	Intermediate	Over-Conditioned	141	27.9	24	36.9	58.8	21.8	15.3	7	19.8	17.1	26.2	41.7	15.4	10.8	4.9
2022-07-31	Matschies	Bek	538	SDZ538B	Intermediate	Ideal	158.5	30.8	25	39.3	69	29	18.2	7.6	19.4	15.8	24.8	43.5	18.3	11.5	4.8
2022-08-07	Matschies	Tristan	497	CM497B	Low	Over-Conditioned	171.2	35.7	28.9	43.8	72.9	28.8	24.5	8.5	20.9	16.9	25.6	42.6	16.8	14.3	5
2022-08-13	Matschies	Zayna	504	ZM504B	Intermediate	Over-Conditioned	94.9	18.5	19.2	27.6	35.5	10.3	11.2	5.5	19.5	20.3	29.1	37.4	10.9	11.8	5.8
2022-08-13	Matschies	Banyon	498	ZM498B	Intermediate	Ideal	201	36.9	39.9	58	78.6	23.9	25.7	11.4	18.3	19.8	28.8	39.1	11.9	12.8	5.7
2022-08-28	Matschies	Keweng	549	RWZ549B	None	NA	116.3	24.8	20.8	28.3	48.9	18.4	16.1	5.5	21.3	17.9	24.3	42.1	15.8	13.9	4.7
2022-08-28	Matschies	Morobe	491	RWZ491B	None	Over-Conditioned	189.9	40.2	34.4	47	80.2	30.1	24.6	8.9	21.2	18.1	24.8	42.2	15.8	13	4.7
2022-08-29	Matschies	LaRoo	477	RWZ477B	None	Ideal	122.7	25.7	19.8	27.4	55.4	20.8	18.6	6.1	21	16.1	22.3	45.1	17	15.1	4.9
2022-08-23	Matschies	Popondetta	554	KCZ554B	Intermediate	NA	84.5	17.2	17	25.5	29.6	6.7	7.5	5.4	20.4	20.2	30.2	35	7.9	8.9	6.3
2022-08-23	Matschies	Gru	515	KCZ515B	Intermediate	Ideal	63.7	12.6	12	17.6	24.4	6.8	7.7	4	19.8	18.8	27.6	38.3	10.6	12.1	6.2
2022-08-23	Matschies	Nokopo	506	KCZ506B	Intermediate	Over-Conditioned	90.2	18.2	17.8	26.4	32.7	7.9	9.2	5.7	20.2	19.7	29.2	36.2	8.8	10.2	6.3
2022-08-30	Matschies	Adoni	535	BMZ535B	Low	Ideal	191.3	44.4	39.9	53.6	69.8	24.9	18.5	8.6	23.2	20.9	28	36.5	13	9.7	4.5
2022-08-13	Matschies	Kasbeth	417	SLZ417B	Low	NA	105.7	22.2	18.4	25.2	45.8	19.7	13.7	5.2	21	17.4	23.8	43.3	18.7	13	4.9
2022-08-29	Matschies	Polly	529	BZ529B	Low	Ideal	191.8	37.3	30.4	48	83.2	34.8	22.8	9.5	19.5	15.8	25	43.4	18.2	11.9	5
2022-08-28	Matschies	Artemis	478	BZ478B	Low	Over-Conditioned	216.9	39.3	37.6	46.2	101.8	35.5	30.9	10.6	18.1	17.4	21.3	46.9	16.4	14.3	4.9
